# Supplementary material
Source: publisher site journal article supplement (https://www.dovepress.com/article/578233)
Supplement: Supplementary file 1 [file 578233_Revised%20Supplementary_Material20251211.docx]

Supplementary Material

**The inflammation effect in the association between bilirubin and chronic kidney disease in patients with type 2 diabetes: a retrospective cohort study**

**Supplementary Table 1**  Baseline Characteristics of Participants Stratifying by the Outcome

|  | Progression of chronic kidney disease | |  |
| --- | --- | --- | --- |
| Variable | No (n=1062) | Yes (n=153) | *P* value |
| Male, n (%) | 587 (55.27) | 92 (60.13) | 0.258 |
| Age, years | 55.72±12.62 | 58.87±10.99 | 0.001 |
| BMI, kg/m2 | 26.87±4.02 | 27.31±4.36 | 0.205 |
| Diabetic duration, years | 10.32±7.96 | 13.12±8.46 | <0.001 |
| History of diabetes, n (%) | 641 (76.95) | 86 (75.44) | 0.720 |
| Systolic blood pressure, mmHg | 134.47±17.43 | 139.92±19.76 | 0.002 |
| Diastolic blood pressure, mmHg | 80.53±10.35 | 81.13±12.19 | 0.512 |
| HbA1c, % | 8.76±1.96 | 8.81±2.11 | 0.734 |
| Triglyceride, mmol/L | 1.69 (1.20,2.38) | 1.77 (1.23,3.14) | 0.099 |
| Total cholesterol, mmol/L | 5.10±1.43 | 5.41±1.80 | 0.044 |
| LDL-cholesterol, mmol/L | 3.44±1.01 | 3.58±1.21 | 0.114 |
| HDL-cholesterol, mmol/L | 1.10±0.27 | 1.14±0.34 | 0.144 |
| Baseline eGFR, mL/min/1.73 m2 | 99.10±20.37 | 77.75±26.54 | <0.001 |
| Baseline UACR, mg/g | 9.52  (5.73,28.03) | 183.59  (16.96,2090.43) | <0.001 |
| Uric acid, µmol/L | 340.53±97.35 | 364.98±91.58 | 0.004 |
| Hemoglobin, g/L | 141.00±15.65 | 132.29±19.52 | <0.001 |
| Neutrophil counts, 109/L | 3.81±1.13 | 4.24±1.32 | <0.001 |
| Monocyte counts, 109/L | 0.47±0.13 | 0.51±0.13 | 0.004 |
| Lymphocyte counts, 109/L | 2.03±0.59 | 2.00±0.65 | 0.518 |
| Platelet counts,109/L | 228.13±55.35 | 231.46±60.22 | 0.493 |
| NLR | 1.99±0.68 | 2.26±0.80 | <0.001 |
| LMR | 4.45±1.35 | 4.03±1.16 | <0.001 |
| PLR | 118.91±35.53 | 124.30±38.72 | 0.083 |
| SIRI | 0.95±0.43 | 1.14±0.45 | <0.001 |
| SII | 451.69±186.85 | 523.59±225.04 | <0.001 |
| ALT, U/L | 26.85±22.05 | 19.87±11.73 | <0.001 |
| AST, U/L | 24.62±15.37 | 21.94±10.68 | 0.038 |
| GGT, U/L | 35.70±34.88 | 37.60±39.47 | 0.537 |
| Total bilirubin, µmol/L | 13.78±5.61 | 11.54±5.90 | <0.001 |
| Indirect bilirubin, µmol/L | 10.28±4.58 | 8.55±4.92 | <0.001 |
| Direct bilirubin, µmol/L | 3.50±1.68 | 2.99±1.57 | <0.001 |
| Insuline use, n (%) | 568 (53.48) | 115 (75.16) | <0.001 |
| Statins use, n (%) | 661 (62.24) | 105 (68.63) | 0.126 |
| ACEi/ARBs use, n (%) | 359 (33.80) | 79 (51.63) | <0.001 |
| SGLT2i use, n (%) | 306 (28.81) | 41 (26.80) | 0.606 |
| GLP-1RA use, n (%) | 148 (13.94) | 21 (13.73) | 0.944 |

Data are expressed as mean ± SD, median (IQR), or n (%).

Abbreviations: BMI, body mass index; HbA1c, hemoglobin A1c; eGFR, estimated glomerular filtration rate; UACR, urinary albumin-creatinine ratio; NLR, neutrophil to lymphocyte ratio; LMR, lymphocyte to monocyte ratio; PLR, platelet to lymphocyte ratio; SIRI, systemic inflammatory response index; SII, systemic immune-inflammation index; ALT, alanine aminotransferase; AST, aspertate aminotransferase; GGT, gamma-glutamyl transpeptidase; ACEi, angiotensin-converting enzyme inhibitor; ARBs, angiotensin II receptor blockers; SGLT2i, sodium-glucose cotransporter 2 inhibitors; GLP-1RA, glucagon-like peptide 1 receptor agonists.

**Supplementary Table 2** Univariate Cox Regression Analysis for CKD Progression

| Variables | HR | 95%CI | *P* value |
| --- | --- | --- | --- |
| Age | 1.02 | (1.01,1.04) | 0.002 |
| Male | 1.26 | (0.91,1.74) | 0.160 |
| Systolic blood pressure | 1.02 | (1.01,1.02) | <0.001 |
| Diastolic blood pressure | 1.01 | (0.99,1.02) | 0.322 |
| BMI | 1.02 | (0.99,1.06) | 0.225 |
| Diabetic duration | 1.04 | (1.02,1.06) | <0.001 |
| HbA1c | 1.02 | (0.94,1.11) | 0.574 |
| HDL-cholesterol | 1.91 | (1.10,3.32) | 0.022 |
| Log-triglycerides | 2.15 | (1.21,3.81) | 0.009 |
| LDL-cholesterol | 1.23 | (1.06,1.43) | 0.007 |
| Total cholesterol | 1.17 | (1.08,1.28) | <0.001 |
| ALT | 0.98 | (0.96,0.99) | <0.001 |
| AST | 0.99 | (0.97,1.00) | 0.059 |
| GGT | 1.00 | (1.00,1.01) | 0.380 |
| Uric acid | 1.00 | (1.00,1.00) | <0.001 |
| Insuline use | 2.37 | (1.64,3.42) | <0.001 |
| Statins use | 1.39 | (1.00,1.96) | 0.058 |
| ACEi/ARBs use | 1.93 | (1.41,2.65) | <0.001 |
| SGLT2i use | 1.15 | (0.80,1.65) | 0.439 |
| GLP-1RA use | 0.91 | (0.57,1.44) | 0.685 |

Abbreviations: CKD, chronic kidney disease; BMI, body mass index; HbA1c, hemoglobin A1c; ALT, alanine aminotransferase; AST, aspertate aminotransferase; GGT, gamma-glutamyl transpeptidase; ACEi, angiotensin-converting enzyme inhibitor; ARBs, angiotensin II receptor blockers; SGLT2i, sodium-glucose cotransporter 2 inhibitors; GLP-1RA, glucagon-like peptide 1 receptor agonists; HR, hazard ratios; 95% CI, 95% confidence intervals.

**Supplementary Table 3** HRs (95% CIs) for Progression of CKD Based on the Inflammatory Indicators

|  | Crude model | | Adjusted model | |
| --- | --- | --- | --- | --- |
| Inflammatory index | HR 95%CI | *P* value | HR 95%CI | *P* value |
| SIRI | 2.56 (1.85,3.54) | <0.001 | 2.05 (1.43,2.96) | <0.001 |
| SII | 1.45(1.26,1.68) | <0.001 | 1.28 (1.10,1.50) | 0.002 |
| NLR | 1.75 (1.42,2.15) | <0.001 | 1.43 (1.14,1.79) | 0.002 |
| LMR | 0.76 (0.66,0.87) | <0.001 | 0.81 (0.70,0.94) | 0.007 |
| PLR | 1.01 (1.00,1.01) | 0.023 | 1.00 (0.99,1.01) | 0.213 |

Crude model: none adjusted.

Adjusted model included following covariates at baseline: age, sex, body mass index, hemoglobin A1c, systolic blood pressure, log-triglycerides, duration of diabetes, LDL-cholesterol, uric acid, alanine aminotransferase, use of statin (yes or no), use of ACE inhibitors or angiotensin receptor blockers (ACEi/ARBs) (yes or no) and insulin treatment (yes or no).

Abbreviations: CKD, chronic kidney disease; HR, hazard ratios; 95% CI, 95% confidence intervals; NLR, neutrophil to lymphocyte ratio; LMR, lymphocyte to monocyte ratio; PLR, platelet to lymphocyte ratio; SIRI, systemic inflammatory response index; SII, systemic immune-inflammation index.

**Supplementary Table 4** Correlation Between Bilirubin and Inflammatory Indicators Assessed by Multiple Linear Regression

|  |  | TBIL | | IBIL | | DBIL |  |
| --- | --- | --- | --- | --- | --- | --- | --- |
|  |  | *β* (95%CI) | *P* value | *β* (95%CI) | *P* value | *β* (95%CI) | *P* value |
| Crude model | SIRI | -0.03(-0.01,0.00) | 0.247 | -0.06 (-0.01,0.00) | 0.037 | 0.05(-0.00,0.03) | 0.062 |
|  | SII | -0.12(-5.95,2.15) | <0.001 | -0.13(-7.70,-3.05) | <0.001 | -0.05(-11.74,1.30) | 0.116 |
|  | NLR | -0.03 (-0.01,0.00) | 0.342 | -0.05 (-0.02,0.00) | 0.058 | 0.06 (0.00,0.05) | 0.042 |
|  | LMR | 0.04 (-0.02,0.00) | 0.140 | -0.02 (-0.02,0.01) | 0.579 | -0.10(-0.02,-0.04) | <0.001 |
|  | PLR | -0.10 (-0.96,-0.25) | 0.001 | -0.10 (-1.18,-0.31) | 0.001 | -0.06(-2.42,-0.00) | 0.050 |
| Adjusted model | SIRI | -0.01 (-0.01,-0.00) | 0.016 | -0.01 (-0.01,-0.00) | 0.001 | 0.01 (-0.01,0.02) | 0.367 |
|  | SII | -2.89 (-4.85,-0.94) | 0.004 | -4.14 (-6.52,-1.83) | 0.001 | -0.12 (-6.87,6.62) | 0.971 |
|  | NLR | -0.00 (-0.01,0.00) | 0.358 | -0.01 (-0.02, 0.00) | 0.054 | 0.03 (0.01,0.05) | 0.019 |
|  | LMR | 0.02 (-0.01,0.02) | 0.524 | 0.04 (-0.01,0.03) | 0.194 | -0.04 (-0.08,0.01) | 0.128 |
|  | PLR | -0.38 (-0.74,-0.01) | 0.046 | -0.51 (-0.95,-0.06) | 0.026 | -0.31 (-1.58,0.96) | 0.631 |

Crude model: none adjusted.

Adjusted model included following covariates at baseline: age, sex, body mass index, hemoglobin A1c, systolic blood pressure, log-triglycerides, duration of diabetes, LDL-cholesterol, uric acid, alanine aminotransferase, use of statin (yes or no), use of ACE inhibitors or angiotensin receptor blockers (ACEi/ARBs) (yes or no) and insulin treatment (yes or no).

Abbreviations: NLR, neutrophil to lymphocyte ratio; LMR, lymphocyte to monocyte ratio; PLR, platelet to lymphocyte ratio; SIRI, systemic inflammatory response index; SII, systemic immune-inflammation index; TBIL, total bilirubin; IBIL, indirect bilirubin; DBIL, direct bilirubin.

**Supplementary Table 5** HRs (95% CIs) for Progression of CKD Based on the Bilirubin Levels

|  | Adjusted model a | | Adjusted model b | | Adjusted model c | | Adjusted model d | |
| --- | --- | --- | --- | --- | --- | --- | --- | --- |
|  | HR (95% CI) | *P* value | HR (95% CI) | *P* value | HR (95% CI) | *P* value | HR (95% CI) | *P* value |
| **Total bilirubin** |  | |  | |  |  |  |  |
| Continuous(per unit) | 0.96(0.92,1.00) | 0.045 | 0.95 (0.92,0.90) | 0.015 | 0.92 (0.89,0.96) | <0.001 | 0.97(0.94,0.99) | 0.013 |
| Categorical |  | |  | |  |  |  |  |
| Tertiles 1 (≤10.50) | Reference | - | Reference | - | Reference | - | Reference | - |
| Tertiles 2 (10.50-14.50) | 0.68 (0.46,1.00) | 0.052 | 0.61 (0.42,0.90) | 0.014 | 0.52 (0.35,0.76) | 0.001 | 0.79(0.60,1.03) | 0.084 |
| Tertiles 3 (>14.50) | 0.57 (0.36,0.90) | 0.016 | 0.52 (0.33,0.82) | 0.005 | 0.39 (0.25,0.61) | <0.001 | 0.71 (0.53,0.96) | 0.025 |
| **Indirect bilirubin** |  | |  | |  |  |  |  |
| Continuous (per unit) | 0.94 (0.90,0.98) | 0.008 | 0.93 (0.89,0.97) | 0.002 | 0.90 (0.85,0.94) | <0.001 | 0.95(0.92,0.98) | <0.001 |
| Categorical |  | |  | |  |  |  |  |
| Tertiles 1 (≤7.80) | Reference | - | Reference | - | Reference | - | Reference | - |
| Tertiles 2 (7.80-11.00) | 0.58 (0.39,0.86) | 0.006 | 0.52 (0.36,0.77) | 0.001 | 0.46 (0.32,0.68) | <0.001 | 0.67(0.50,0.88) | 0.004 |
| Tertiles 3 (>11.00) | 0.45 (0.28,0.71) | 0.001 | 0.43 (0.27,0.68) | <0.001 | 0.32 (0.20,0.50) | <0.001 | 0.62(0.46,0.83) | 0.001 |
| **Direct bilirubin** |  | |  | |  |  |  |  |
| Continuous (per unit) | 1.05 (0.93,1.19) | 0.404 | 1.02(0.91,1.15) | 0.760 | 0.97 (0.86,1.09) | 0.631 | 1.09(1.00,1.18) | 0.041 |
| Categorical |  | |  | |  |  |  |  |
| Tertiles 1 (≤2.60) | Reference | - | Reference | - | Reference | - | Reference | - |
| Tertiles 2 (2.60-3.80) | 1.22 (0.83,1.79) | 0.316 | 1.35 (0.92,1.96) | 0.122 | 1.24 (0.85,1.81) | 0.257 | 1.53 (1.17,2.01) | 0.002 |
| Tertiles 3 (>3.80) | 1.13 (0.72,1.79) | 0.600 | 1.07 (0.68,1.68) | 0.788 | 0.90 (0.57,1.42) | 0.653 | 1.42 (1.03,1.95) | 0.031 |

Adjusted model included following covariates at baseline: age, sex, body mass index, hemoglobin A1c, systolic blood pressure, log-triglycerides, duration of diabetes, LDL-cholesterol, uric acid, alanine aminotransferase, use of statin (yes or no), use of ACE inhibitors or angiotensin receptor blockers (ACEi/ARBs) (yes or no) and insulin treatment (yes or no).

a Model further adjusted eGFR at baseline.

b Model further adjusted hemoglobin at baseline.

c Model further adjusted SGLT2i use at baseline.

d Model further conducted the analysis by redefining the renal outcome as the progression of the eGFR category alone from baseline.

Abbreviations: CKD, chronic kidney disease; HR, hazard ratios; 95% CI, 95% confidence intervals.

**Supplementary Fig. 1 Subgroup Analysis of the Association Between Bilirubin and CKD Progression.**

**
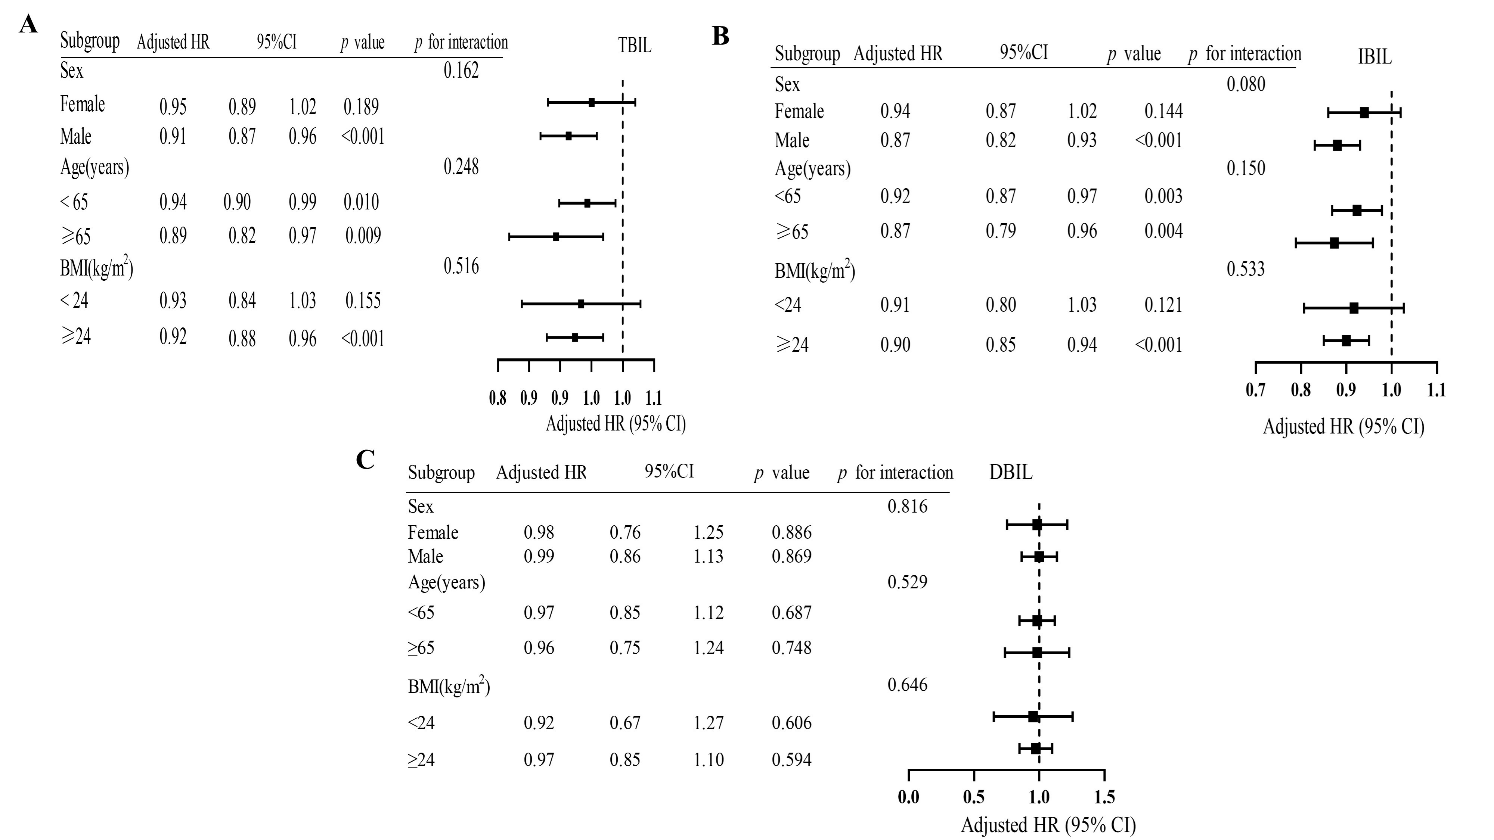
**

A, B, and C represent the associations of total bilirubin (TBIL), indirect bilirubin (IBIL), and direct bilirubin (DBIL) with CKD progression, respectively. The following covariates at baseline were in corporated into the model (except stratification variables): age, sex, body mass index, hemoglobin A1c, systolic blood pressure, log-triglycerides, duration of diabetes, LDL-cholesterol, uric acid, alanine aminotransferase, use of statin (yes or no), use of ACE inhibitors or angiotensin receptor blockers (ACEi/ARBs) (yes or no) and insulin treatment (yes or no).

Abbreviations: CKD, chronic kidney disease; BMI, body mass index; HR, hazard ratios; 95% CI, 95% confidence intervals.

**Supplementary Material 1**

STROBE Statement—checklist of items that should be included in reports of observational studies

|  | **Item No.** | **Recommendation** | **Page  No.** | **Relevant text from manuscript** |
| --- | --- | --- | --- | --- |
| **Title and abstract** | 1 | (*a*) Indicate the study’s design with a commonly used term in the title or the abstract | 1 |  |
| (*b*) Provide in the abstract an informative and balanced summary of what was done and what was found | 2-3 |  |
| **Introduction** | | | |  |
| Background/rationale | 2 | Explain the scientific background and rationale for the investigation being reported | 4-5 |  |
| Objectives | 3 | State specific objectives, including any prespecified hypotheses | 6 |  |
| **Methods** | | | |  |
| Study design | 4 | Present key elements of study design early in the paper | 6 |  |
| Setting | 5 | Describe the setting, locations, and relevant dates, including periods of recruitment, exposure, follow-up, and data collection | 7-8 |  |
| Participants | 6 | (*a*) *Cohort study*—Give the eligibility criteria, and the sources and methods of selection of participants. Describe methods of follow-up  *Case-control study*—Give the eligibility criteria, and the sources and methods of case ascertainment and control selection. Give the rationale for the choice of cases and controls  *Cross-sectional study*—Give the eligibility criteria, and the sources and methods of selection of participants | 6 |  |
| (*b*)*Cohort study*—For matched studies, give matching criteria and number of exposed and unexposed  *Case-control study*—For matched studies, give matching criteria and the number of controls per case |  |  |
| Variables | 7 | Clearly define all outcomes, exposures, predictors, potential confounders, and effect modifiers. Give diagnostic criteria, if applicable | 7 |  |
| Data sources/ measurement | 8* | For each variable of interest, give sources of data and details of methods of assessment (measurement). Describe comparability of assessment methods if there is more than one group | *8* |  |
| Bias | 9 | Describe any efforts to address potential sources of bias |  |  |
| Study size | 10 | Explain how the study size was arrived at | 6 |  |

Continued on next page

| Quantitative variables | 11 | Explain how quantitative variables were handled in the analyses. If applicable, describe which groupings were chosen and why | 8 |  |
| --- | --- | --- | --- | --- |
| Statistical methods | 12 | (*a*) Describe all statistical methods, including those used to control for confounding | 8-9 |  |
| (*b*) Describe any methods used to examine subgroups and interactions | 9 |  |
| (*c*) Explain how missing data were addressed |  |  |
| (*d*) *Cohort study*—If applicable, explain how loss to follow-up was addressed  *Case-control study*—If applicable, explain how matching of cases and controls was addressed  *Cross-sectional study*—If applicable, describe analytical methods taking account of sampling strategy |  |  |
| (*e*) Describe any sensitivity analyses | 9 |  |
| **Results** | | | | |
| Participants | 13* | (a) Report numbers of individuals at each stage of study—eg numbers potentially eligible, examined for eligibility, confirmed eligible, included in the study, completing follow-up, and analysed | 10 |  |
| (b) Give reasons for non-participation at each stage |  |  |
| (c) Consider use of a flow diagram |  |  |
| Descriptive data | 14* | (a) Give characteristics of study participants (eg demographic, clinical, social) and information on exposures and potential confounders | 11 |  |
| (b) Indicate number of participants with missing data for each variable of interest | 6 |  |
| (c) *Cohort study*—Summarise follow-up time (eg, average and total amount) | 11 |  |
| Outcome data | 15* | *Cohort study*—Report numbers of outcome events or summary measures over time | 11 |  |
| *Case-control study—*Report numbers in each exposure category, or summary measures of exposure |  |  |
| *Cross-sectional study—*Report numbers of outcome events or summary measures |  |  |
| Main results | 16 | (*a*) Give unadjusted estimates and, if applicable, confounder-adjusted estimates and their precision (eg, 95% confidence interval). Make clear which confounders were adjusted for and why they were included | 11-13 |  |
| (*b*) Report category boundaries when continuous variables were categorized |  |  |
| (*c*) If relevant, consider translating estimates of relative risk into absolute risk for a meaningful time period |  |  |

Continued on next page

| Other analyses | 17 | Report other analyses done—eg analyses of subgroups and interactions, and sensitivity analyses 12 |  |  |
| --- | --- | --- | --- | --- |
| **Discussion** | | | | |
| Key results | 18 | Summarise key results with reference to study objectives 14 |  |  |
| Limitations | 19 | Discuss limitations of the study, taking into account sources of potential bias or imprecision. Discuss both direction and magnitude of any potential bias 17-18 |  |  |
| Interpretation | 20 | Give a cautious overall interpretation of results considering objectives, limitations, multiplicity of analyses, results from similar studies, and other relevant evidence 14-17 |  |  |
| Generalisability | 21 | Discuss the generalisability (external validity) of the study results 18 |  |  |
| **Other information** | | 18-20 | | |
| Funding | 22 | Give the source of funding and the role of the funders for the present study and, if applicable, for the original study on which the present article is based 19 |  |  |

*Give information separately for cases and controls in case-control studies and, if applicable, for exposed and unexposed groups in cohort and cross-sectional studies.

**Note:** An Explanation and Elaboration article discusses each checklist item and gives methodological background and published examples of transparent reporting. The STROBE checklist is best used in conjunction with this article (freely available on the Web sites of PLoS Medicine at http://www.plosmedicine.org/, Annals of Internal Medicine at http://www.annals.org/, and Epidemiology at http://www.epidem.com/). Information on the STROBE Initiative is available at www.strobe-statement.org.
